# Supplementary material for: Regulation of proinflammatory genes by the circulating microRNA hsa-miR-939
Source: PubMed Central journal article supplement (PMC4976376; doi:10.1038/srep30976), 2016-08-08
Supplement: srep30976-s1.pdf [file srep30976-s1.pdf]

## Regulation of proinflammatory genes by the circulating microRNA hsa-miR-939

Marguerite K. McDonald,<sup>a,d\*</sup> Sujay Ramanathan,<sup>a\*</sup> Andrew Touati,<sup>a</sup> Yiqian Zhou,<sup>b</sup> Rushi U. Thanawala,<sup>a</sup>  
Guillermo M. Alexander,<sup>c</sup> Ahmet Sacan,<sup>b</sup> and Seena K. Ajit<sup>a¶</sup>

<sup>a</sup>Pharmacology & Physiology, <sup>c</sup>Neurology, Drexel University College of Medicine, 245 North 15th Street,  
Philadelphia, PA 19102, USA

<sup>b</sup>School of Biomedical Engineering, Science & Health Systems, Drexel University, 3141 Chestnut Street,  
Philadelphia, PA 19104, USA

<sup>d</sup>Gene Therapy Program, Perelman School of Medicine, University of Pennsylvania, Suite 2000,  
Translational Research Laboratories (TRL), 125 S. 31st Street, Philadelphia, PA 19104-3403, USA

\* These authors contributed equally

¶ Corresponding author

### Contact information of the corresponding author

Seena Ajit PhD  
Pharmacology & Physiology  
Drexel University College of Medicine  
245 North 15th Street, Mail Stop 488  
Philadelphia, PA 19102  
Tel.: +1 215 762 2218  
Fax: +1 215 762 2299  
E-mail: [seena.ajit@drexelmed.edu](mailto:seena.ajit@drexelmed.edu)

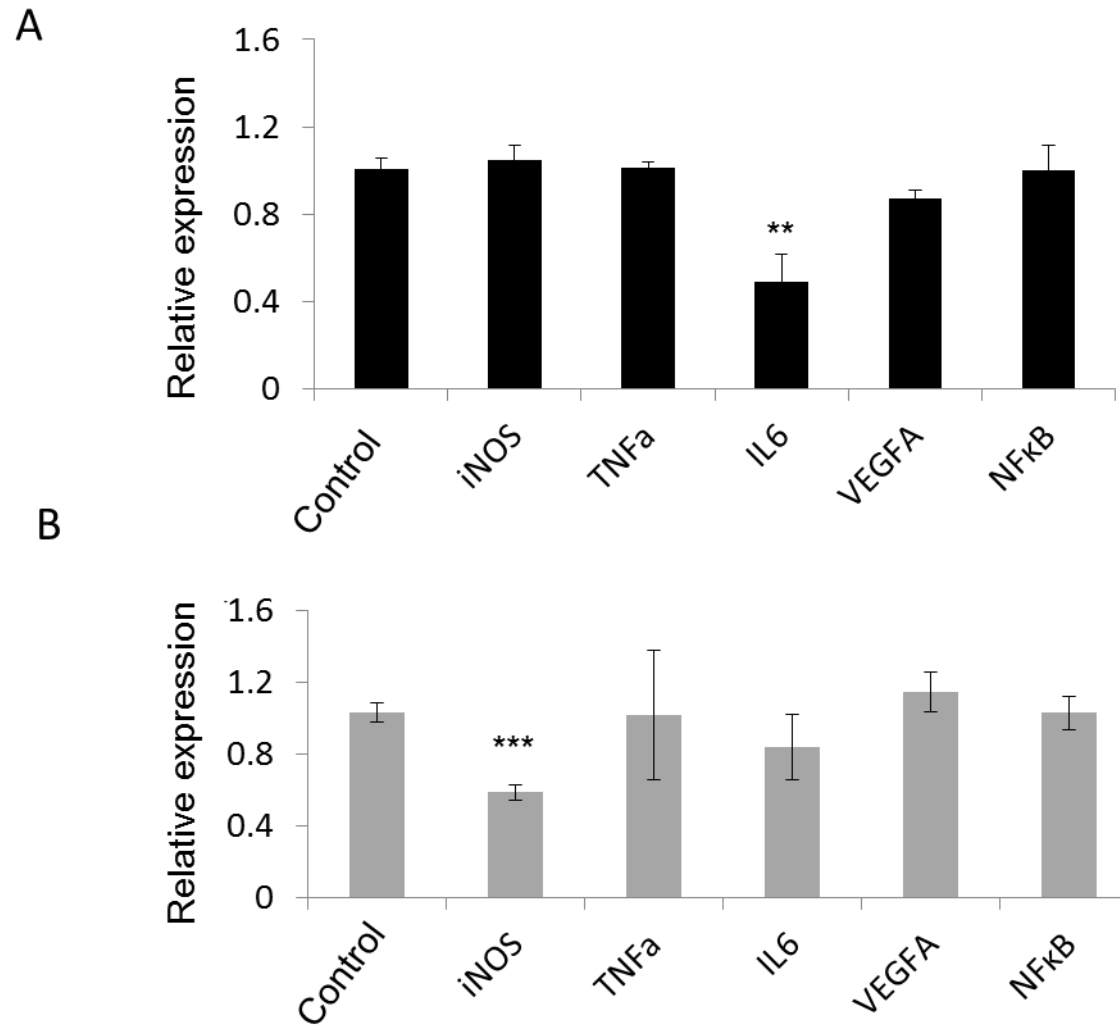

**Supplementary Figure S1. Relative expressions of miR-939 target genes in THP-1 (A) and HUVEC (B) cells transfected with miR-939.** Taqman analysis of endogenous levels of NOS2A (iNOS), TNF $\alpha$ , IL-6, VEGFA, and NF $\kappa$ B in THP-1 and HUVEC cells determined 24 hours after transfection with miR-939. *GAPDH* was used as a housekeeping gene. Significance was determined by one-way ANOVA \*\* $p < 0.01$ , \*\*\* $p < 0.001$ .

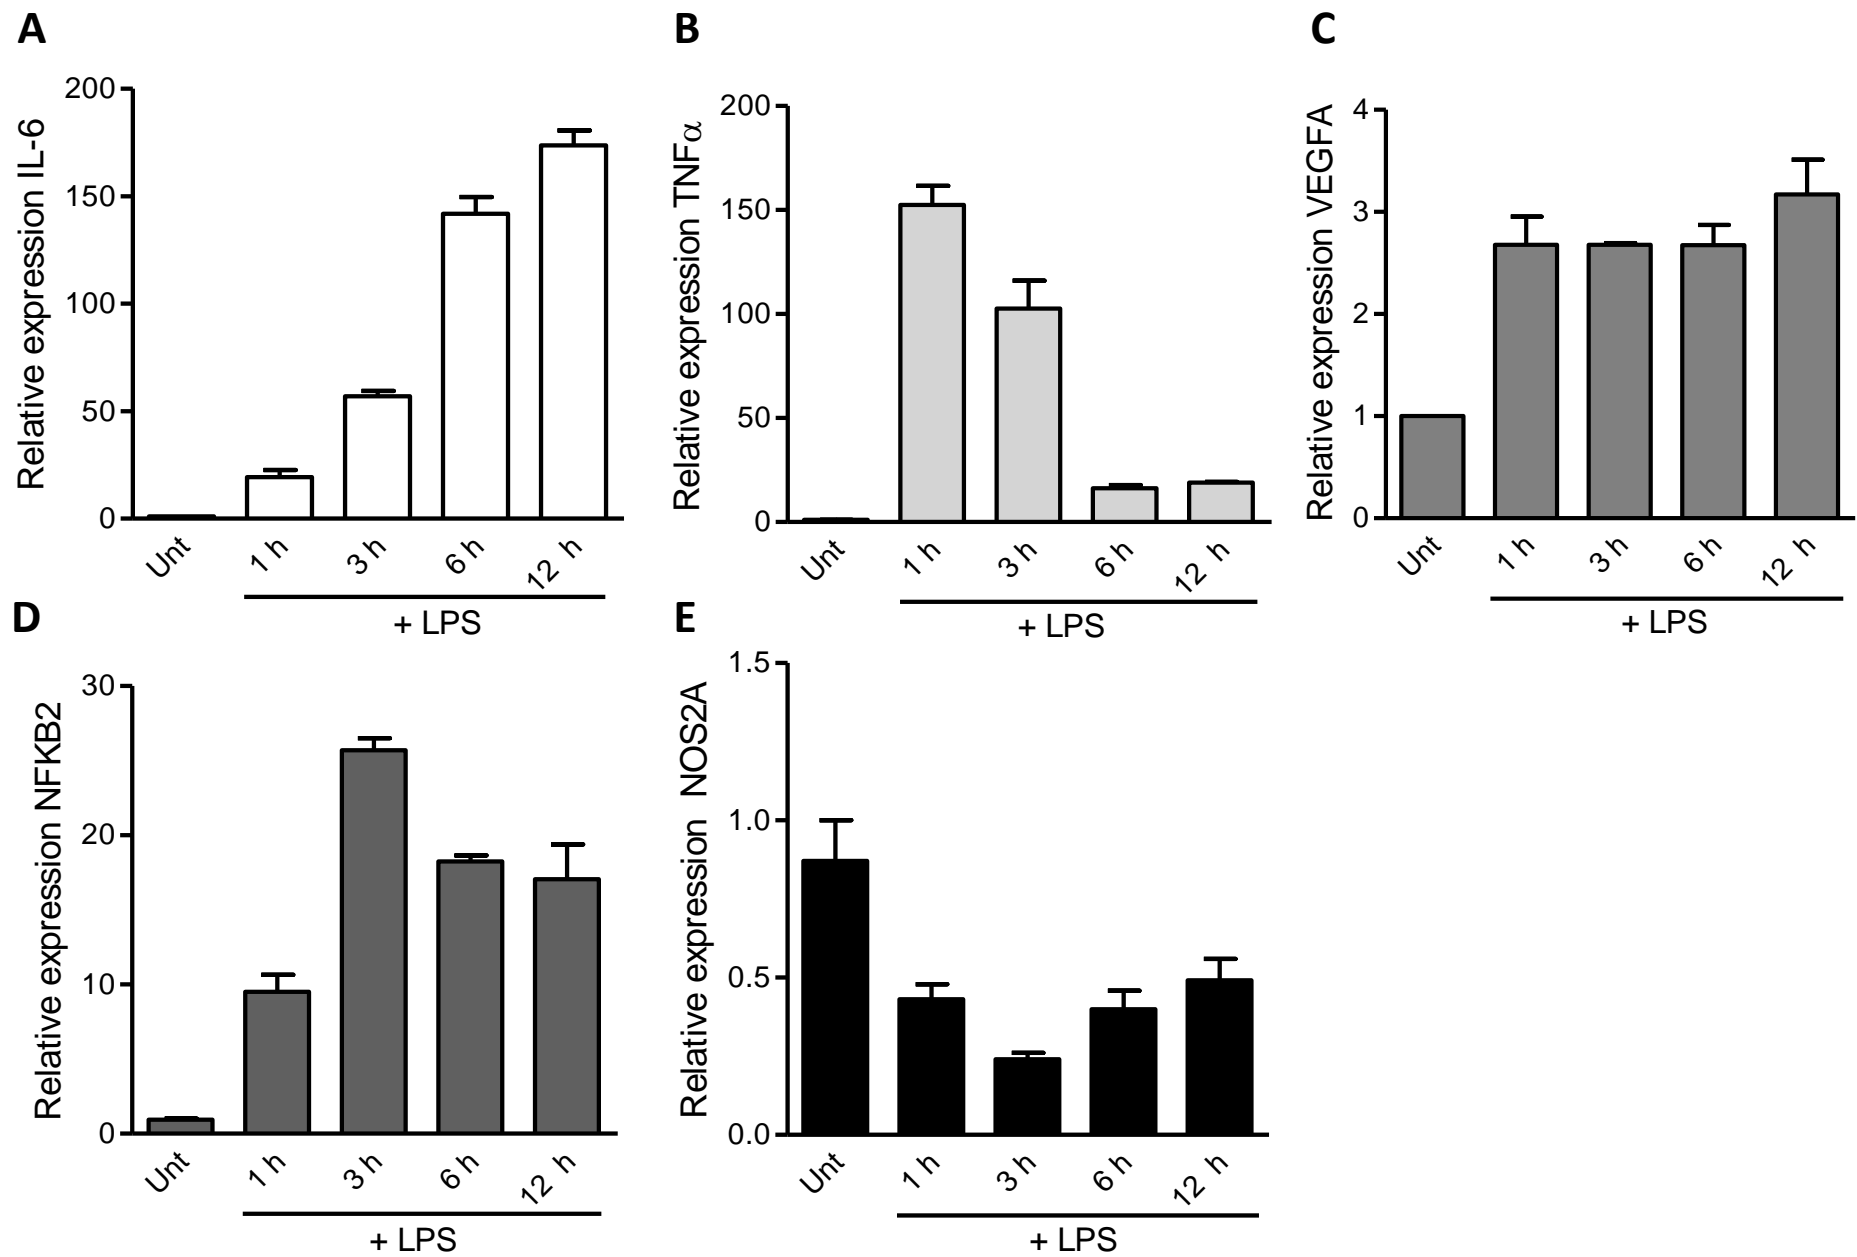

**Supplementary Figure S2.** Time course of LPS induced mRNA alterations for the miR-939 target genes in THP-1 cells. *GAPDH* was used as a housekeeping gene.

**A**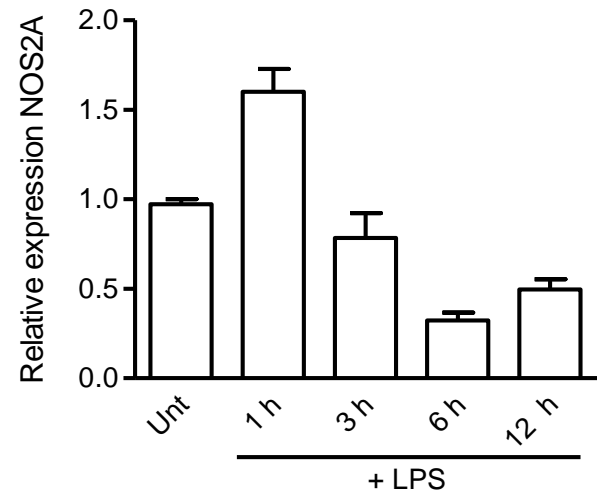**B**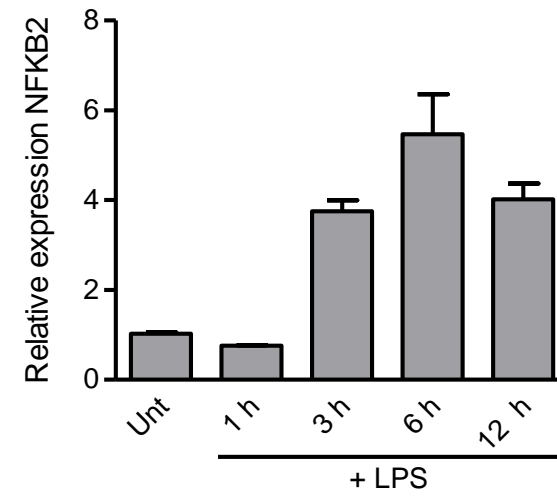

**Supplementary Figure S3.** Time course of LPS induced mRNA alterations for NOS2A and NFkB in HUVEC cells. *GAPDH* was used as a housekeeping gene.

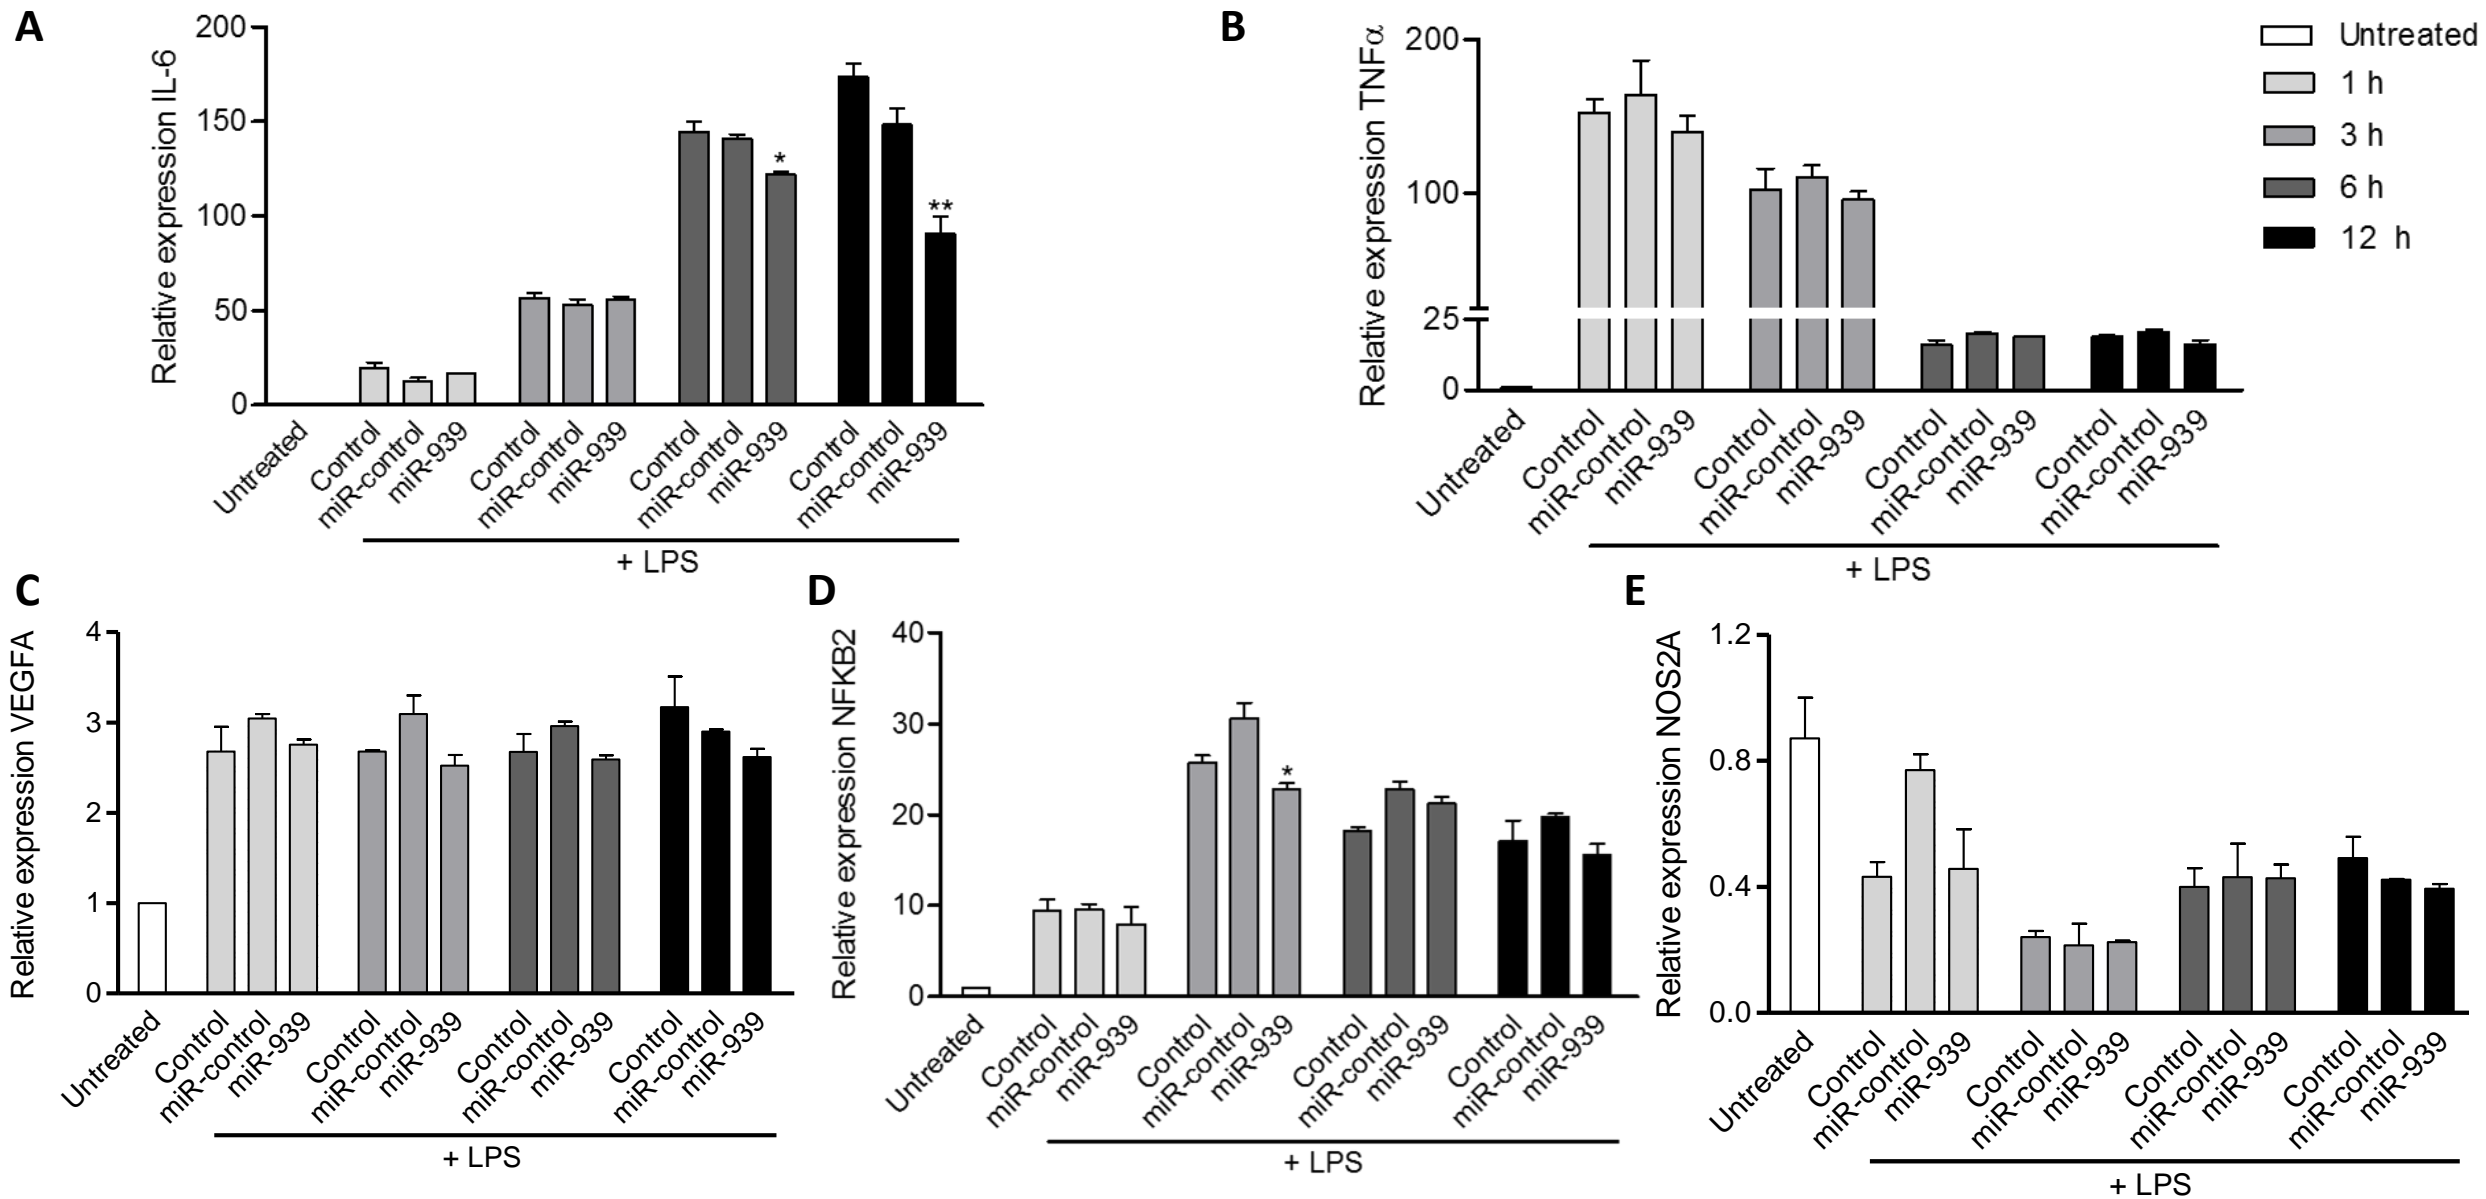

**Supplementary Figure S4.** Expression levels of miR-939 target genes IL-6, TNF $\alpha$ , VEGFA, NFKB2 and NOS2A in THP-1 cells transfected with miR-939 followed by LPS stimulation. Significance was determined by one-way ANOVA with Dunnet's post hoc test \*  $p < 0.05$ , \*\*  $p < 0.01$ .

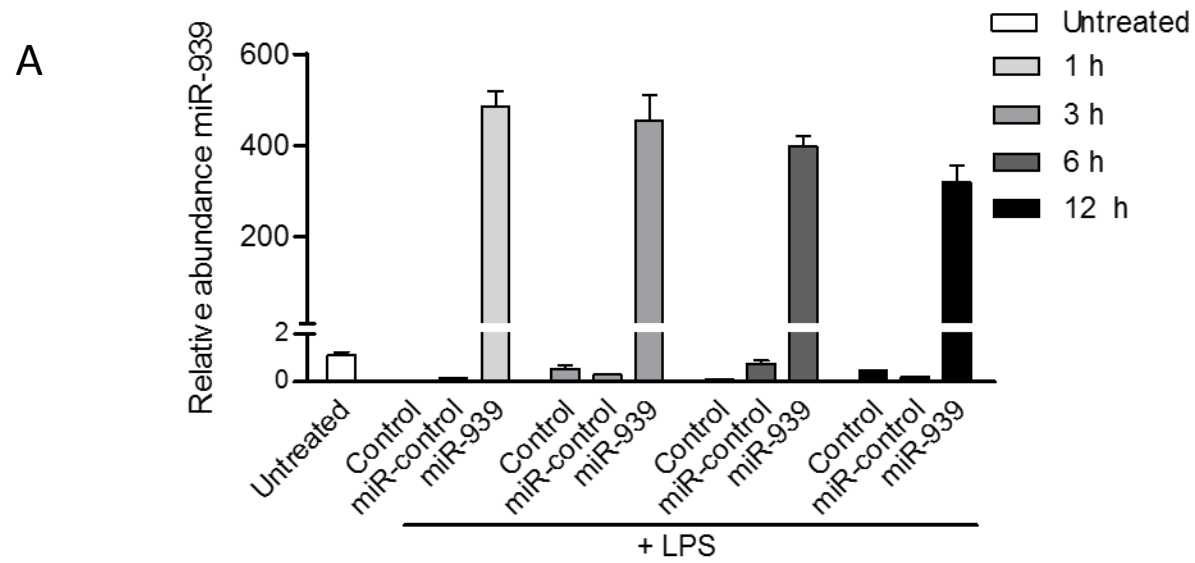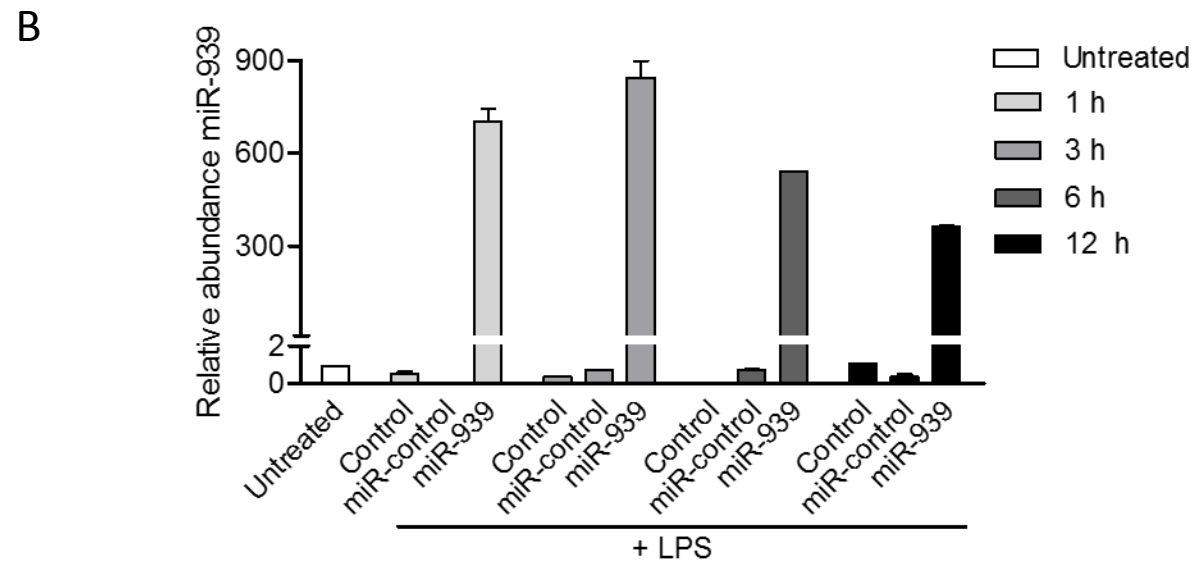

**Supplementary Figure S5.** Relative abundance of miR-939 in THP-1 (A) and HUVEC (B) cells transfected with miR-939 determined by qPCR. *U6* was used as the normalizer.
